# Supplementary material
Source: publisher figshare collection journal article supplement (https://tandf.figshare.com/ndownloader/files/14079737)
Supplement: Supplementary file 1 [file 14079737]

**Supplementary file**

**Synthesis and antimicrobial activity of some** [**benzoxazinoids**](http://www.ncbi.nlm.nih.gov/pubmed/26988518) **derivatives of 2-nitrophenol and 3-hydroxy-2-nitropyridine**

William Gustavo Lima1, Flávio José Leite dos Santos2, Adriana Cristina Soares3, Antonio F. A. Macias4, Jose M. G. Molinillo4, Jaqueline Maria Siqueira Ferreira1 and João Máximo Siqueira2

1Laboratory of Medical Microbiology, Central-West Campus Dona Lindu, Federal University of São João del-Rei, Divinopolis, MG, Brazil.

2Laboratory of Pharmacognosy and Chemistry of Natural Products, Central-West Campus Dona Lindu, Federal University of São João del-Rei, Divinopolis, MG, Brazil.

3Laboratory of Pharmacology of pain and inflammation, Central-West Campus Dona Lindu, Federal University of São João del-Rei, Divinopolis, MG, Brazil.

4Allelopathy Group, Department of Organic Chemistry, Institute of Biomolecules (INBIO), Campus CEIA3, School of Science, University of Cadiz, Puerto Real (Cádiz), Spain.

**Table of contents:**

Chemo-informatics analysis …………………………………………………….……………………… 2

Experimental details ……………...……………………………………….……………………. 2

Table S1 ………………………..………………………………………….….……………….... 3

Spectral and Chemical Data ……………………………………………………………………………. 4

Benzoxazinone series (1a-e) ……………………………………………………………………… 4

Pyridoxazinone series (2a-e) ……………………………………………………………………… 5

**Chemo-informatics analysis**

***Experimental details:***

To calculate the physicochemical (LogP, LogS, molecular weight, numbers of acceptor and donor groups of hydrogen bond), toxicological (irritative, tumorigenic, and anti-reproductive effects), and pharmaceutical (drug-likeness) properties of the compounds, we employed chemo-informatics analyses. The two-dimensional chemical structures of the benzoxazinoids analogues were inserted into DataWarrior 4.2.2 software and subsequently, the parameters of interest were calculated.[11] Then, the values of molecular weight, LogP, and the amounts of donor and acceptor groups of the hydrogen bond were compared with the Lipinski rules.[12] Compounds that fit at all points were provided with the descriptor "respect all". However, if any of them were violated, the descriptor "not respect all" was employed, followed by the description of the rule in non-compliance.

**Table S1:** Chemical structures, physical-chemical properties proprieties and predictors of toxicity to the benzoxazinoids analogs.

| **Compound** | **R** | **Molecular weight (g/mol)** | **LogP Oct/Wat** | **H-Acceptor** | **H-Donors** | **Tumorogenic** | **Reprodutive effect** | **Lipinski´s ruleb** | **Druglikeness** |
| --- | --- | --- | --- | --- | --- | --- | --- | --- | --- |
| **1a** | -H | 165.15 | 0.42 | 4 | 1 | Low | None | Respect all | 0.35 |
| **1b** | -CH3 | 179.17 | 0.75 | 4 | 1 | Low | None | Respect all | 1.69 |
| **1c** | -CH2CH3 | 193.20 | 1.20 | 4 | 1 | Low | None | Respect all | 3.20 |
| **1d** | -CH2CH2CH3 | 207.23 | 1.65 | 4 | 1 | Low | None | Respect all | 0.59 |
| **1e** | -CH2CH2CH2CH3 | 221.25 | 2.11 | 4 | 1 | Low | None | Respect all | -3.30 |

| **Compound** | **R** | **Molecular weight (g/mol)** | **LogP Oct/Wat** | **H-Acceptor** | **H-Donors** | **Tumorogenic** | **Reprodutive effect** | **Lipinski´s ruleb** | **Druglikeness** |
| --- | --- | --- | --- | --- | --- | --- | --- | --- | --- |
| **2a** | -H | 166.13 | -0,23 | 5 | 1 | None | None | Respect all | 0.35 |
| **2b** | -CH3 | 180.16 | 0.09 | 5 | 1 | None | None | Respect all | 1.69 |
| **2c** | -CH2CH3 | 194.19 | 0.55 | 5 | 1 | None | None | Respect all | 3.20 |
| **2d** | -CH2CH2CH3 | 208.21 | 1.01 | 5 | 1 | None | None | Respect all | 0.59 |
| **2e** | -CH2CH2CH2CH3 | 222.24 | 1.46 | 5 | 1 | None | None | Respect all | -3.30 |

aThe physical-chemicals proprieties and predictors of toxicity ware calculated using DataWarrior software version 4.2.2. **b**Lipinski´s rule follow the criteria: Molecular less than 500; logP (the logarithm of the partition coefficient between water and 1-octanol) less than 5; Number of groups in the molecule that can donate hydrogen atoms to hydrogen bonds less than 5; Number of groups that can accept hydrogen atoms to form hydrogen bonds less than 10.

**Chemicals and spectral details:**

**Benzoxazinone serie (1a-e)**

All chemical and spectral data this series was anteriorly described by Macias et al.[6].

Compound **1a**

4-hydroxy-*2H*-benzo[b][1,4]oxazin-3(*4H*)-one **(1a):** Yield 71%, 386 mg

Compound **1b**

4-hydroxy-2-methyl-*2H*-benzo[b][1,4]oxazin-3(*4H*)-one (**1b)**: Yield 59%, 600 mg

Compound **1c**

2-ethyl-4-hydroxy-*2H*-benzo[b][1,4]oxazin-3(*4H*)-one **(1c)**: Yield 63%, 305 mg

Compound **1d**

2-propyl-4-hydroxy-*2H*-benzo[b][1,4]oxazin-3(*4H*)-one **(1d):** Yield 54%, 900 mg

Compound **1e**

2-buthyl-4-hydroxy-*2H*-benzo[b][1,4]oxazin-3(*4H*)-one **(1e):** Yield 51%, 900 mg

**Pyridoxazinone series (2a-e):**

Compound **2a**

4-hydroxy-*2H*-pyrido[3,2-b][1,4]oxazin-3(*4H*)-one **(2a)**: Yield 84%, 810 mg.

Spectral data of compound **2a**

**1H NMR** (200 MHz, DMSO-d6): H-4 **8.03, dd, 0.9; 4.7 Hz; H-5 **7.07, dd, 4.8, 7.9 Hz; H-6 ** 7.39, dd, 1.0, 7.8 Hz; H-1´ ** 4.87, s; N-OH ** 10.53, s.

**13C NMR** (50 MHz, DMSO-d6): 141.9 (C-2), 140.1(C-3),123.0 (C-4), 119.7 (C-5), 140.7 (C-6), 67.9 (C-1´), 161.4 (C-2’).

**HRMS (ESI):** Calculated for C7H7N2O3 [M+H]+, 167.1451; found, 167.1664.

**-**

**1H NMR spectrum**

(ppm)

**13C NMR**

(ppm)

Compound **2b**

4-hydroxy-2-methyl-*2H*-pyrido[3,2-b][1,4]oxazin-3(*4H*)-one **(2b)**: Yield 85%, 220 mg.

Spectral data of compound **2b**

**1H NMR** (200 MHz, CDCl3): H-4 ** 8.02, dd, 1.4; 5.2 Hz; H-5 **7.02, dd, 5.2, 8.0 Hz; H-6 ** 7.32, dd, 1.4, 7.8 Hz; H-1´ ** 4.84, m; H-1” ** 1.60, d, 4.0 Hz; N-OH d 9.94, br s.

**13C NMR** (50 MHz, CDCl3): 142.1 (C-2), 140.1(C-3),125.0 (C-4), 119.9 (C-5), 139.4 (C-6), 75.2 (C-1´), 163.74 (C-2’), 16.8 (C-1”).

**HRMS (ESI):** Calculated for C8H9N2O3 [M+H] +, 181.0608; found, 181.0610.

**1H NMR spectrum**

(ppm)

**13C NMR**

(ppm)

Compound **2c**

2-ethyl-4-hydroxy-*2H*-pyrido[3,2-b][1,4]oxazin-3(*4H*)-one **(2c)**: Yield 71%, 190 mg.

Spectral data of compound **2c**

**1H NMR** (200 MHz, CDCl3): H-4 ** 7.99, dd, 1.3; 5.2 Hz; H-5 **7.00, dd, 5.2, 8.0 Hz; H-6 ** 7.30, dd, 1.3, 7.8 Hz; H-1´ ** 4.69, m; H-1” ** 1.78-2.03, m; H-2” **1.01, t, 7.4 Hz; N-OH ** 9.83, br s.

**13C NMR** (50 MHz, CDCl3): 141.8 (C-2), 140.0(C-3),125.0 (C-4), 119.9 (C-5), 139.0 (C-6), 79.8 (C-1´), 163.22 (C-2’ ), 24.6(C-1”), 9,04 (C-2”).

**HRMS (ESI):** Calculated for C9H11N2O3 [M+H]+, 195.0764; found, 195.0765.

**1H NMR spectrum**

(ppm)

**13C NMR**

(ppm)

Compound **2d**

4-hydroxy-2-propyl-*2H*-pyrido[3,2-b][1,4]oxazin-3(*4H*)-one **(2d)**: Yield 67%, 625 mg.

Spectral data of compound **2d**

**1H NMR** (200 MHz, DMSO-d6): H-4 **8.04, dd, 1.4, 4.8 Hz; H-5 **7.08, dd, 4.8, 7.9 Hz; H-6  7.42, dd, 1.4, 7.7 Hz; H-1´ ** 4.91, m; 1” ** 1.81, m, H-2” ** 1.48, m; H-3” ** 0.92, t, 7.3 Hz; N-OH 10.55, s.

**13C NMR** (50 MHz, DMSO-d6): 142.6 (C-2), 141.5 (C-3),124.1 (C-4), 120.5 (C-5), 139.7 (C-6), 78.2 (C-1’), 163.9 (C-2’), 33.1 (C-1”), 18.2(C-2”), 14,2 (C-3”).

**HRMS (ESI):** Calculated for C10H13N2O3 [M+H]+, 209.0921; found, 209.1588

**1H NMR spectrum**

**13C NMR**

Compound **2e**

2-butyl-4-hydroxy-*2H*-pyrido[3,2-b][1,4]oxazin-3(*4H*)-one **(2e)**: Yield: 59%, (740 mg).

Spectral data of compound **2e**

**1H NMR** (200 MHz, DMSO-d6): H-4 ** 8.03, dd, 1.4; 4.7 Hz; H-5 **7.07, dd, 4.8, 7.9 Hz; H-6 ** 7.42, dd, 1.5, 7.9 Hz; H-1´ ** 4.89, m; H-1” ** 1.81, m, H-2” ** 1.37, m; H-3”** 1.37, m; H-4’’ **0.87, t, 7.1 Hz; N-OH ** 10.53, s.

**13C NMR** (50 MHz, DMSO-d6): 142.6 (C-2), 141.5 (C-3),124.1 (C-4), 120.5 (C-5), 139.7 (C-6), 78.4 (C-1’), 163.9 (C-2’ ), 30.8 (C-1”), 27.00(C-2”), 22.4 (C-3”), 14.5 (C-4”).

**HRMS (ESI):** Calculated for C11H15N2O3 [M+H]+, 223.1077; found, 223.1082

**1H NMR spectrum**

**13C NMR**
